# Supplementary material for: Cinnamon extracts, trans -cinnamaldehyde and trans -cinnamic acid inhibit HDAC 1 activity
Source: Royal Society of Chemistry journal article supplement (doi:10.1039/d4fo02764g), 2024-01-01
Supplement: d4fo02764g1.pdf [file d4fo02764g1.pdf]

## **Chemicals**

Folin-Ciocalteu reagent, gallic acid, quercetin, sodium sulphate, trans-cinnamaldehyde and trans-cinnamic acid were purchased from Sigma-Aldrich (Germany). Aluminum chloride, DMSO and potassium acetate were purchased from Carlo Erba (Germany). 2-Methyltetrahydrofuran (2-MeTHF), ethanol, dichloromethane (DCM), hexane, potassium chloride, sodium acetate and sodium carbonate were purchased from Merck (Germany). All chemicals were of analytical grade. Water was produced with Stakpure Omnia Type I Ultrapure Water Systems (Germany).

**Table S1.** Dose-response values of trichostatin A for the calculation of IC<sub>50</sub>

| Trichostatin A | Dose (nM) | % Inhibition | Standard Deviation | %RSD   |
|----------------|-----------|--------------|--------------------|--------|
|                | 4940      | 100.000      | 2.083              | 2.083  |
|                | 1235      | 99.990       | 5.882              | 5.883  |
|                | 123       | 74.435       | 3.048              | 4.095  |
|                | 12        | 26.048       | 3.223              | 12.373 |
|                | 1         | 9.978        | 1.778              | 17.819 |

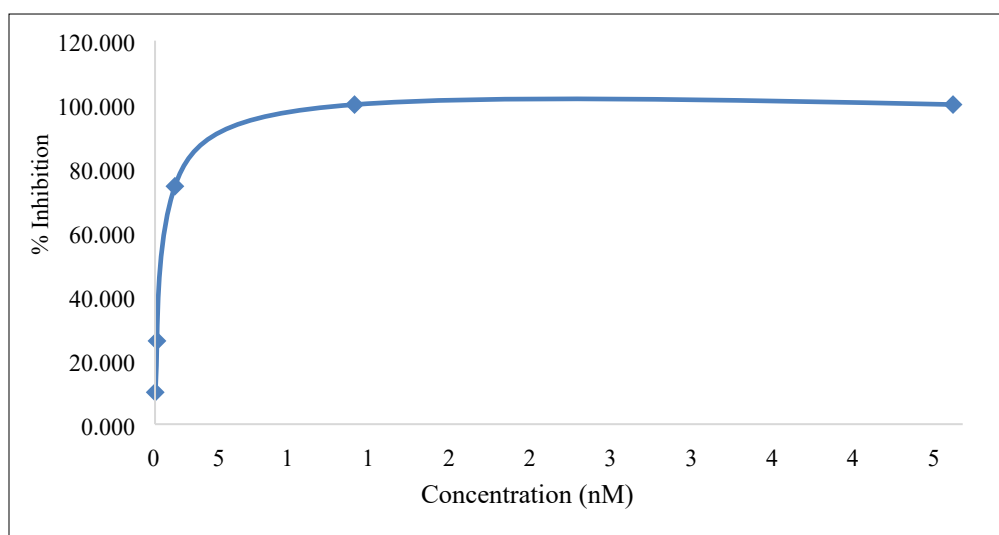

**Fig.S1** Dose-response curve of trichostatin A for HDAC 1 inhibitory activity

**Table S2.** Dose-response values of 70% ethanol extract for the calculation of IC<sub>50</sub>

| 70% Ethanol Extract | Dose (µg/ml) | % Inhibition | Standard Deviation | %RSD  |
|---------------------|--------------|--------------|--------------------|-------|
|                     | 1000         | 90.400       | 2.405              | 2.660 |
|                     | 250          | 63.610       | 2.179              | 3.426 |
|                     | 50           | 37.686       | 0.724              | 1.921 |

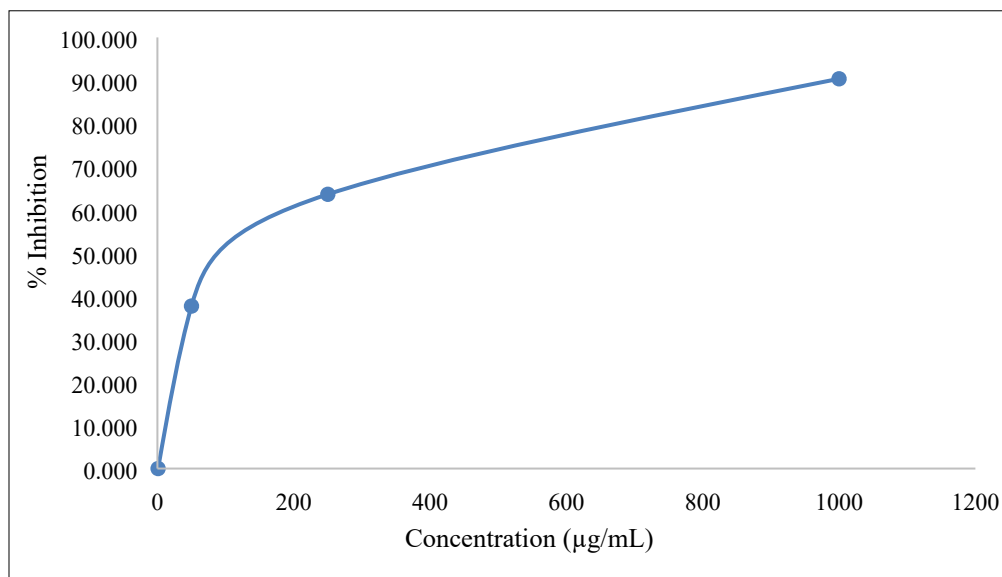

**Fig.S2** Dose-response curve of 70% ethanol extract for HDAC 1 inhibitory activity

**Table S3.** Dose-response values of essential oil for the calculation of IC<sub>50</sub>

| Essential Oil | Dose (µg/ml) | % Inhibition | Standard Deviation | %RSD  |
|---------------|--------------|--------------|--------------------|-------|
|               | 1000         | 85.590       | 1.793              | 2.095 |
|               | 250          | 51.115       | 2.493              | 4.877 |
|               | 50           | 49.622       | 0.842              | 1.697 |

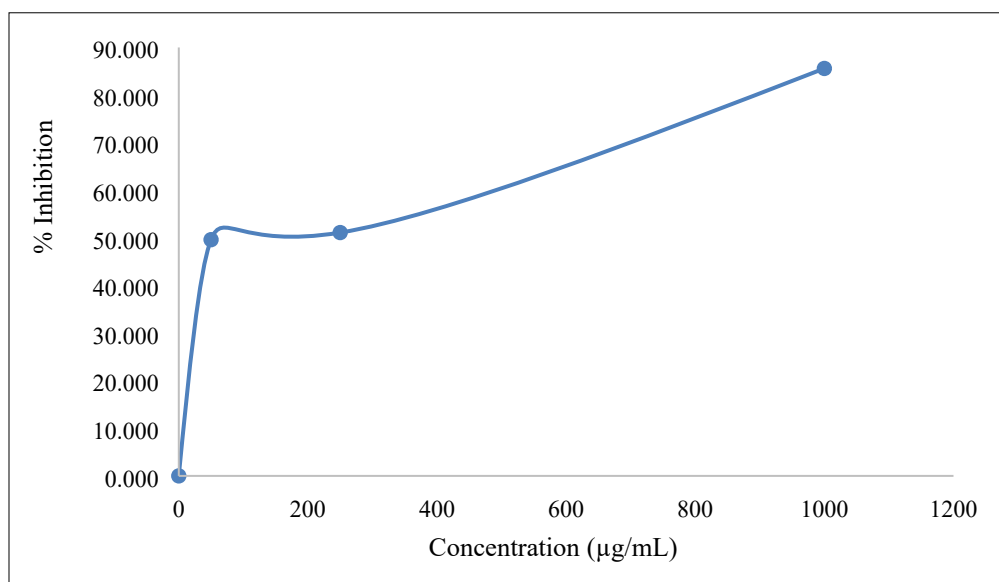

**Fig.S3** Dose-response curve of essential oil for HDAC 1 inhibitory activity

**Table S4.** Dose-response values of trans-Cinnamic acid for the calculation of IC<sub>50</sub>

| trans-Cinnamic acid | Dose (µg/ml) | % Inhibition | Standard Deviation | %RSD  |
|---------------------|--------------|--------------|--------------------|-------|
|                     | 47.500       | 76.987       | 1.999              | 2.597 |
|                     | 11.875       | 53.126       | 2.771              | 5.216 |
|                     | 2.969        | 33.970       | 0.096              | 0.283 |

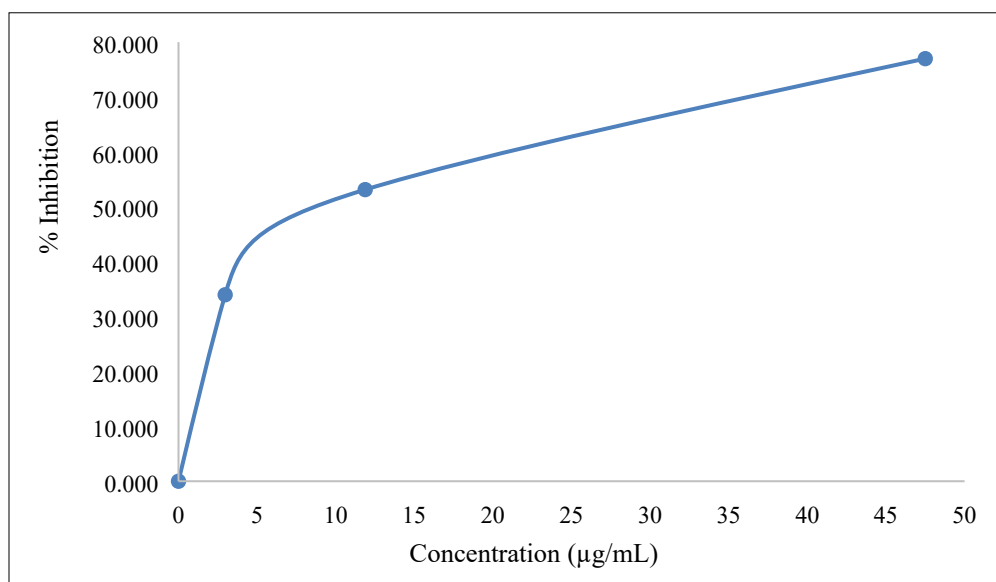

**Fig.S4** Dose-response curve of trans-Cinnamic acid for HDAC 1 inhibitory activity

**Table S5.** Dose-response values of trans-Cinnamaldehyde for the calculation of IC<sub>50</sub>

| trans-Cinnamaldehyde | Dose (µg/ml) | % Inhibition | Standard Deviation | %RSD  |
|----------------------|--------------|--------------|--------------------|-------|
|                      | 47.500       | 75.318       | 1.900              | 2.523 |
|                      | 11.875       | 64.301       | 1.191              | 1.852 |
|                      | 2.969        | 30.700       | 0.949              | 3.091 |

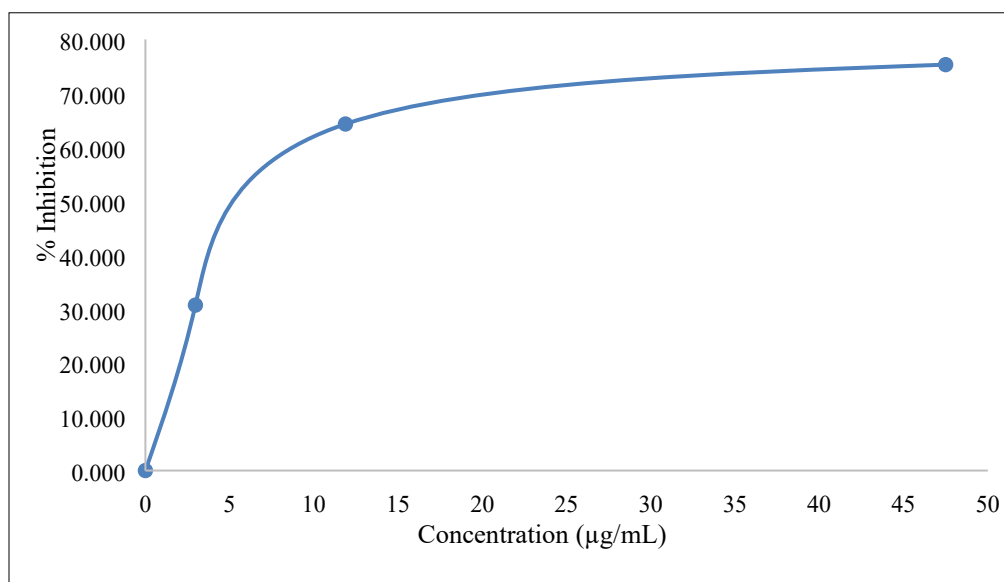

**Fig.S5** Dose-response curve of trans-Cinnamaldehyde for HDAC 1 inhibitory activity
